# Supplementary material for: Identifying Recrudescent Plasmodium falciparum in Treated Malaria Patients by Real-time PCR and High Resolution Melt Analysis of Genetic Diversity
Source: PubMed Central journal article supplement (PMC6031682; doi:10.1038/s41598-018-28179-2), 2018-07-04

**Identifying Recrudescence *Plasmodium falciparum* in Treated Malaria Patients by Real-time PCR and High Resolution Melt Analysis of Genetic Diversity**

Khalid B Beshir<sup>1\*</sup>, Nouhoum Diallo<sup>2</sup>, and Colin J. Sutherland<sup>1,3</sup>

1. Department of Immunology & Infection, Faculty of Infectious & Tropical Disease, London School of Hygiene & Tropical Medicine.
2. Malaria Research and Training Centre (MRTC), Department of Epidemiology of Parasitic Diseases, Faculty of Pharmacy, University of Sciences, Techniques and Technologies of Bamako, Mali.
3. Department of Clinical Parasitology, Hospital for Tropical Diseases, University College London Hospitals Foundation Trust

\* Address correspondence to Khalid B Beshir, Department of Immunology and Infection, Faculty of Infectious & Tropical Disease, London School of Hygiene & Tropical Medicine. Keppel Street, London WC1E 7HT, United Kingdom. Email: Khalid.Beshir@lshtm.ac.uk

**Key words:** HRM, *msp1*, *msp2*, recrudescence, re-infection

## Supplementary material

**Figure S1. Determination of clones from dried bloodspot samples for *msp1* (A1) and *msp2* (A2) relative to positive controls; melting amplification curves for *msp1* (B1) and *msp2* (C1) and normalized temperature-shifted HRM amplification curves for *msp1* (B2) and *msp2* (C2) of genotypes in 18 kenya asymptomatic children sampled before (hr 0) and after treatment ( day 7, 14, 21 or 28).**

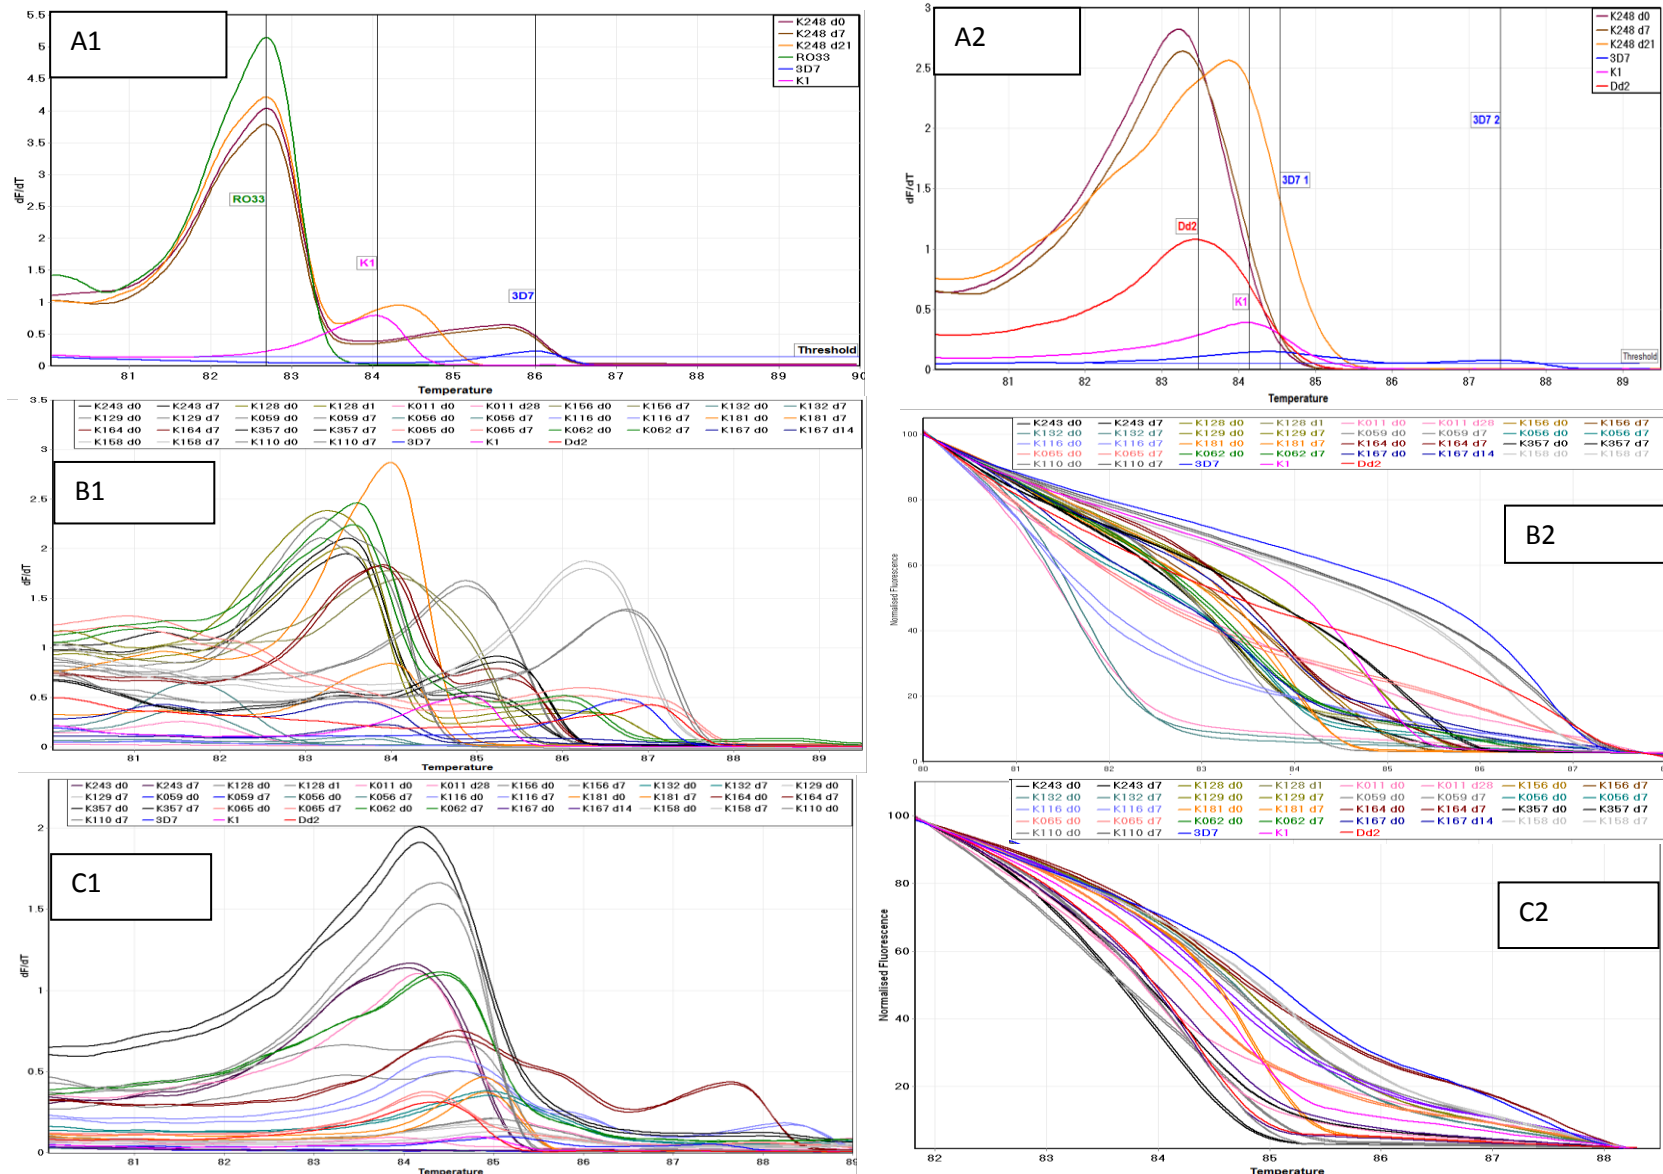

Table S1: Clones and allelic family of field dried bloodspot samples generated by gel-based PCR and HRM genotyping using *msp1* and *msp2* assays. The table shows six laboratory strains and 18-paired samples. *Msp1* and *msp2* HRM melt curves for the samples was determined by the software after threshold adjustment (Supplementary Fig S1 A) and the allelic family was determined relative to the laboratory strains with known clones.

| Lab strain<br>Patient ID | Gel electrophoresis<br>Allelic family |                         | Genotype called by the HRM software<br>Allelic family (lab strain) |                           | <i>Msp1</i> HRM<br>melting curve | <i>Msp2</i> HRM<br>melting curve |
|--------------------------|---------------------------------------|-------------------------|--------------------------------------------------------------------|---------------------------|----------------------------------|----------------------------------|
|                          | <i>Msp1</i> (base pair)               | <i>Msp2</i> (base pair) | <i>Msp1</i>                                                        | <i>Msp2</i>               |                                  |                                  |
| 3D7                      | K1                                    | IC/3D7                  | K1                                                                 | IC3D7                     | 86.0                             | 85.30 and 87.5                   |
| 7G8                      | RO33                                  | IC/3D7                  | RO33                                                               | IC3D7                     | 83.3                             | 84.3 and 87.3                    |
| K1                       | K1                                    | FC27                    | K1                                                                 | FC27                      | 84.0 & 84.8                      | 82.8 and 84.8                    |
| RO33                     | RO33                                  | IC3D7                   | RO33                                                               | IC3D7                     | 83.2                             | 84.3 and 87.3                    |
| Dd2                      | K1                                    | FC27                    | Dd2                                                                | FC27                      | 86.5                             | 83.5                             |
| D10                      | MAD20                                 | FC27                    | MAD20                                                              | FC27                      | 81.6                             | 83.5                             |
| K011 d0                  | K1 & RO33                             | FC27                    | Dd2                                                                | FC27 (Dd2)                | 81.6                             | 84.2                             |
| K011 d28                 | K1 & MAD20                            | NEG                     | NEG                                                                | FC27 (Dd2)                | NEG                              | 83.8                             |
| K059 d0                  | RO33                                  | FC27                    | RO33                                                               | FC27 (K1)                 | 83.2 & 83.8                      | 84.6                             |
| K059 d7                  | RO33                                  | FC27                    | RO33                                                               | FC27 (K1)                 | 83.2 & 83.8                      | 84.6                             |
| K056 d0                  | K1                                    | FC27                    | 7G8                                                                | FC27 (K1)                 | 83.8                             | 84.0                             |
| K056 d7                  | K1                                    | FC27                    | 7G8                                                                | FC27 (K1)                 | 83.8                             | 84.0                             |
| K062 d0                  | K1                                    | NEG                     | 7G8 & 3D7                                                          | FC27 (Dd2)                | 83.5 & 86.0                      | 84.5                             |
| K062 d7                  | NEG                                   | FC27                    | 7G8 & 3D7                                                          | FC27 (Dd2)                | 83.5 & 86.0                      | 84.5                             |
| K065 d0                  | RO33 & K1                             | FC27                    | K1 & 3D7                                                           | FC27 (Dd2)                | 86.0 & 87.2                      | 84.5                             |
| K065 d7                  | RO33 & K1                             | FC27                    | K1 & 3D7                                                           | FC27 (Dd2)                | 86.0 & 87.2                      | 84.5                             |
| K110 d0                  | K1                                    | IC/3D7                  | 3D7                                                                | FC27 (Dd2) & IC/3D7 (3D7) | 86.7                             | 84.3, 85.5 & 88                  |
| K110 d7                  | K1                                    | IC/3D7                  | 3D7                                                                | FC27 (Dd2) & IC/3D7 (3D7) | 86.7                             | 84.3, 85.5 & 88                  |

| Lab strain<br>Patient ID       | Gel electrophoresis<br>Allelic family                            |                                    | Genotype called by the HRM software<br>Allelic family (lab strain) |                                                        | Msp1 HRM<br>melting curve                 | Msp2 HRM<br>melting curve              |
|--------------------------------|------------------------------------------------------------------|------------------------------------|--------------------------------------------------------------------|--------------------------------------------------------|-------------------------------------------|----------------------------------------|
|                                | Msp1 (base pair)                                                 | Msp2 (base pair)                   | Msp1                                                               | Msp2                                                   |                                           |                                        |
| K116 d0<br>K116 d7             | MAD20<br>MAD20                                                   | IC/3D7 & FC27<br>FC27              | RO33<br>RO33                                                       | FC27 (Dd2) & IC/3D7 (3D7)<br>FC27 (Dd2) & IC/3D7 (3D7) | 81.4<br>81.4                              | 84.5,85.5 & 88<br>84.5,85.5 & 88       |
| K128 d0<br>K128 d1             | RO33 & K1<br>RO33 & K1                                           | FC27<br>FC27                       | RO33 & K1<br>RO33 & K1                                             | FC27 (Dd2 & K1)<br>FC27 (Dd2 & K1)                     | 83.5 & 86<br>83.5 & 86                    | 83.4 & 84.5<br>83.4 & 84.5             |
| K132 d0<br>K132 d7             | RO33<br>NEG                                                      | IC/3D7 (2)<br>IC/3D7 (2)           | RO33<br>RO33                                                       | IC/3D7 (3D7)<br>IC/3D7 (3D7)                           | 82.5<br>82.7                              | 85.0 & 89.0<br>85.0 & 89.0             |
| K129 d0<br>K129 d7             | K1<br>K1                                                         | FC27 & IC/3D7<br>FC27 & IC/3D7 (2) | K1<br>K1                                                           | FC27 (K1) & IC/3D7 (3D7)<br>FC27 (K1) & IC/3D7 (3D7)   | 84.8<br>84.8                              | 84.6, 85.8 & 87.9<br>84.6, 85.8 & 87.9 |
| K158 d0<br>K158 d7             | RO33<br>RO33                                                     | FC27<br>NEG                        | 3D7<br>3D7                                                         | FC27 (K1)<br>FC27 (K1)                                 | 86.3<br>86.3                              | 84.8<br>84.8                           |
| K164 d0<br>K164 d7             | K1(200, 240)<br>K1(200, 240)                                     | IC/3D7<br>FC27 (250,300)           | K1 & 3D7<br>K1 & 3D7                                               | FC27 (K1) IC/3D7 (3D7)<br>FC27 (K1) IC/3D7 (3D7)       | 83.8 & 85.5<br>83.8 and 85.5              | 84.5, 85.5 & 87.5<br>84.5, 85.5 & 87.5 |
| K167 d0<br>K167 d14            | RO33 (220 & 300)<br>RO33 (220 & 300)                             | FC27<br>FC27                       | RO33, 7G8 & K1<br>7G8 & K1                                         | FC27 (Dd2)<br>IC/3D7                                   | 81.3, 83.5 & 85.5<br>83.9 & 85.5          | 83.8<br>85.3 & 87.3                    |
| K156 d0<br>K156 d7             | K1<br>NEG                                                        | FC27<br>FC27                       | D10 & 7G8<br>7G8                                                   | FC27 (K1)<br>FC27 (K1)                                 | 81.5 & 84.1<br>84.1                       | 84.5<br>84.5                           |
| K181 d0<br>K181 d7             | K1<br>K1                                                         | FC27<br>FC27                       | MAD20 & 7G8<br>MAD20 & 7G8                                         | FC27 (K1)<br>FC27 (K1)                                 | 81.2 & 84<br>81.2 & 84                    | 84.5<br>84.5                           |
| K243 d0<br>K243 d7             | RO33/K1<br>RO33, K1 (200,240) &<br>MAD20                         | FC27<br>FC27                       | MAD20,RO33&K1<br>MAD20,RO33&K1                                     | FC27 (Dd2)<br>FC27 (Dd2)                               | 81.5, 83.2 & 85.0<br>81.5, 83.2 & 85.0    | 84.0<br>84.0                           |
| K251 d0<br>K251 d7             | NEG<br>NEG                                                       | FC27<br>FC27                       | RO33 & 3D7<br>NEG                                                  | FC27 (Dd2)<br>FC27 (Dd2)                               | 82.4, 83.37 & 85.2                        | 84.3                                   |
| K248 d0<br>K248 d7<br>K248 D21 | K1 & RO33 (200, 250)<br>K1 & RO33 (200, 250)<br>K1 (200,220,300) | FC27<br>FC27<br>FC27               | K1 & 3D7<br>K1 & 3D7<br>K1 & RO33                                  | FC27 (Dd2)<br>FC27 (Dd2)<br>FC27 (K1)                  | 82.7 & 85.9<br>82.7 & 85.9<br>82.7 & 84.4 | 83.2<br>83.2<br>83.9                   |
| K357 d0<br>K357 d7             | RO33 & K1<br>RO33 & K1                                           | FC27<br>FC27                       | RO33 & K1<br>RO33 & K1                                             | FC27 (Dd2)<br>FC27 (Dd2)                               | 83.4 & 85.2<br>83.4 & 85.2                | 84.3<br>84.3                           |

**Figure S2: Amplicon product of *msp1* PCR (K1, RO33 and MAD20) and *msp2* (FC27 and IC/3D7) of dried bloodspot samples on gel-electrophoresis.** Msp1 and Msp2 Allelic family of paired samples (day 0 and day 7 or 14 or 21 or 28) of 18 Kenyan asymptomatic children.

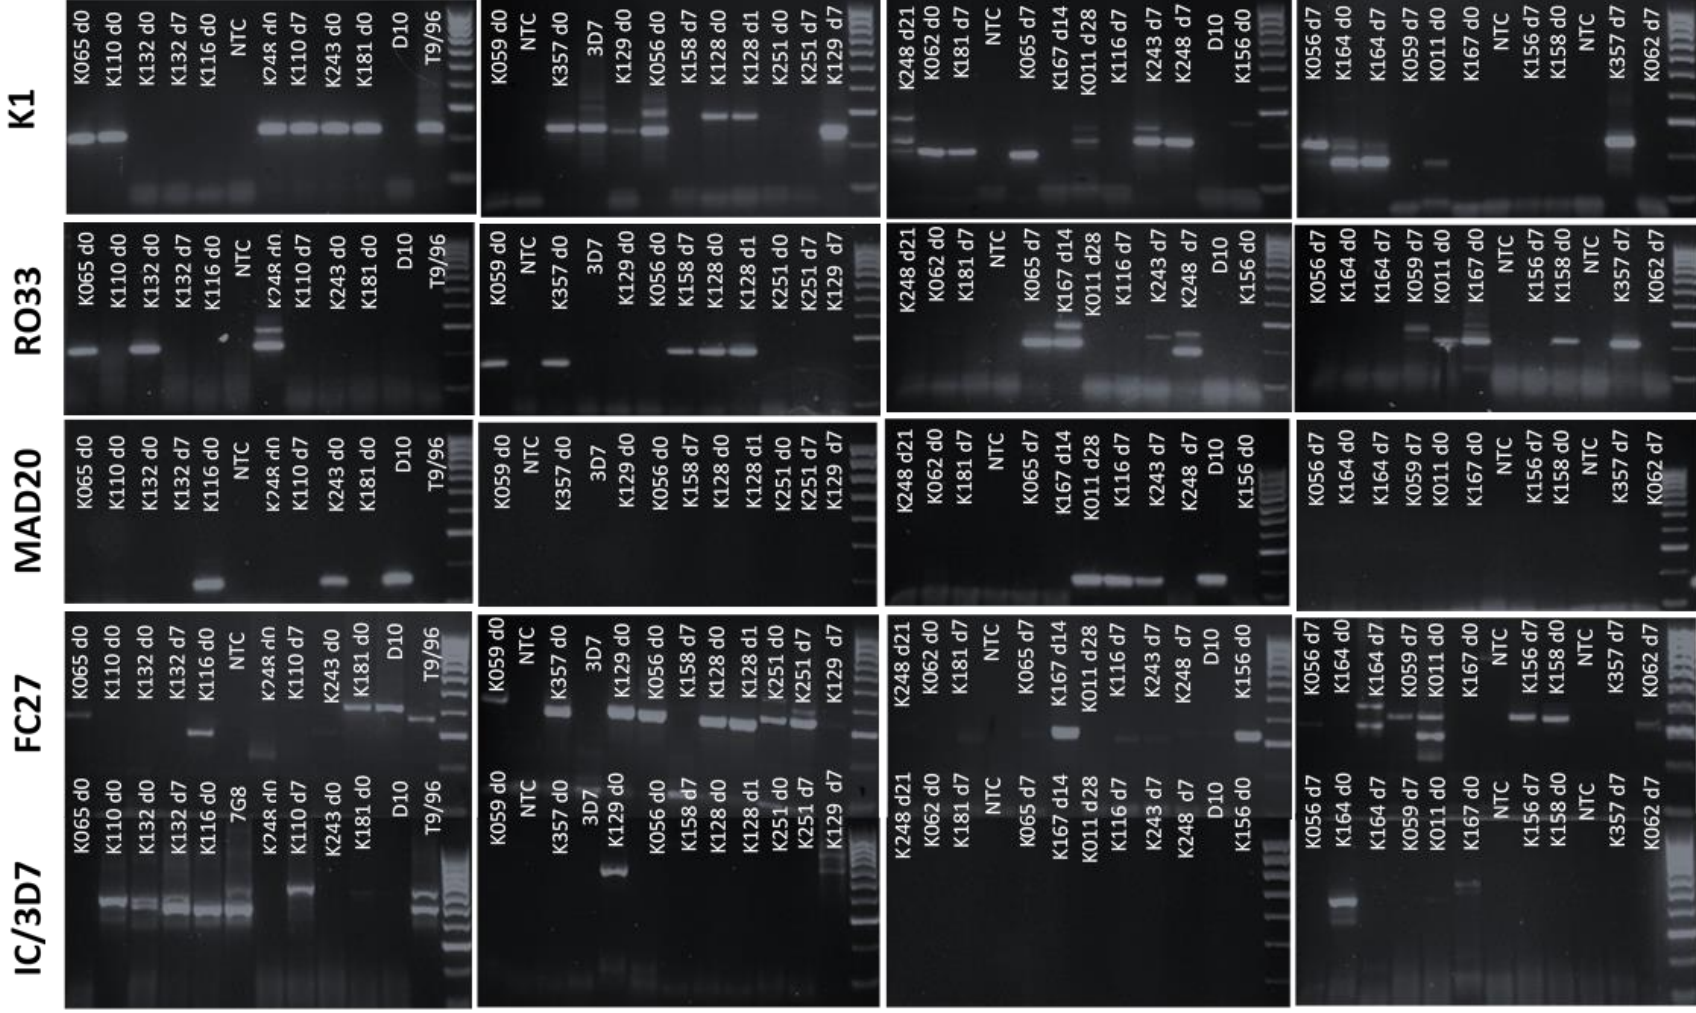

Supplement: 41598_2018_28179_MOESM1_ESM.pdf [file 41598_2018_28179_MOESM1_ESM.pdf]
